# Supplementary material
Source: PubMed Central journal article supplement (PMC3770174)
Supplement: supp_81.2.184_Figure_e-1.pdf [file supp_81.2.184_Figure_e-1.pdf]

**Figure e-1** Kaplan-Meier survival curves for time from pivotal trial randomization to death and from onset of clinical symptoms to death

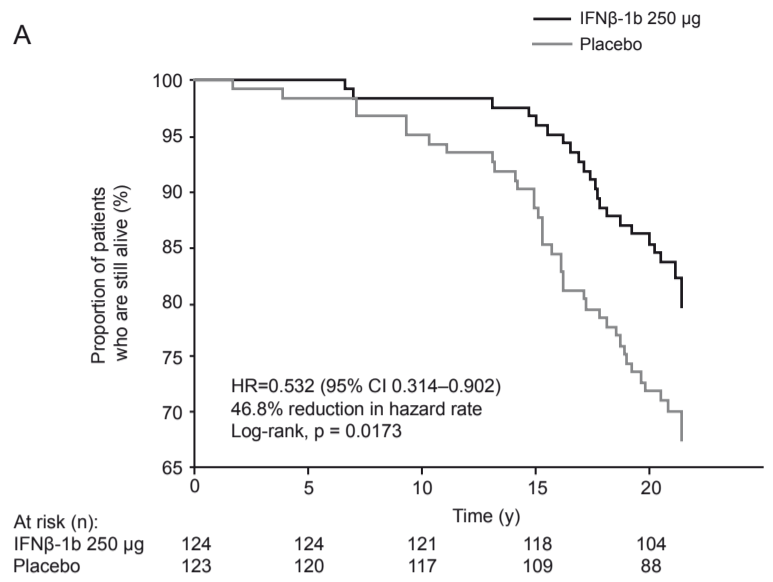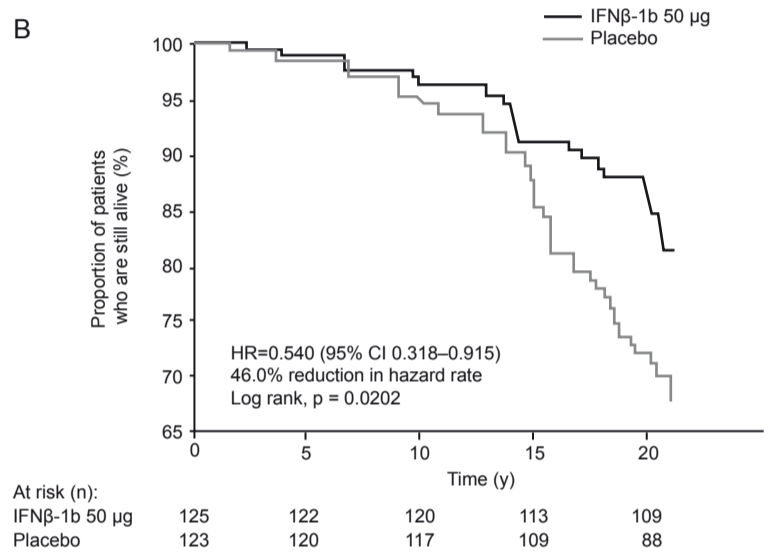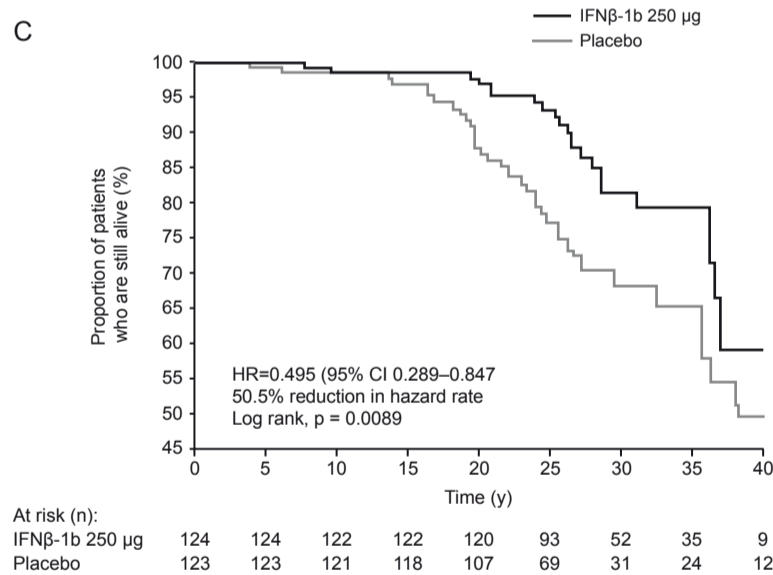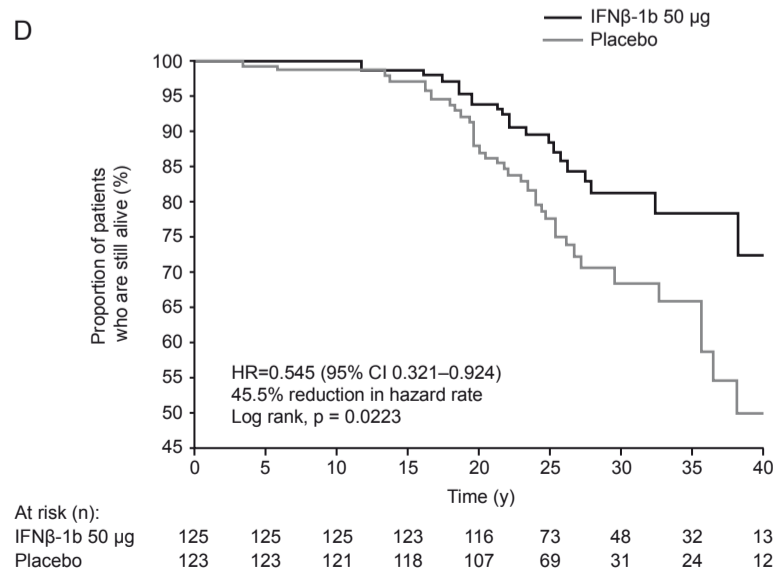

Survival from pivotal randomized controlled trial randomization over 21 years is shown for interferon beta-1b (IFNβ-1b) 250 μg vs placebo (A) and IFNβ-1b 50 μg vs placebo (B). Time from onset of clinical symptoms to death is shown for IFNβ-1b 250 μg vs placebo (C) and IFNβ-1b 50 μg vs placebo (D). Hazard ratios (HRs) and 95% confidence intervals (CIs) are estimated using Cox proportional hazard models without stratification.
